# Supplementary material for: Pentaatomic planar tetracoordinate carbon molecules [XCAl3]q [(X,q) = (B,−2), (C,−1), (N,0)] with C–X multiple bonding
Source: Royal Society of Chemistry journal article supplement (doi:10.1039/c0cp00296h), 2010-01-01
Supplement: c0cp00296h.pdf [file c0cp00296h.pdf]

**Pentaatomic planar tetracoordinate carbon molecules  $[\text{XCAI}_3]^q$   $[(\text{X},q)=(\text{B},-2), (\text{C},-1), (\text{N},0)]$  with C–X multiple bonding**

**Supporting Information.**

Zhong-hua Cui, Chang-bin Shao, Si-meng Gao and Yi-hong Ding\*

*State Key Laboratory of Theoretical and Computational Chemistry, Institute of Theoretical Chemistry, Jilin University, Changchun 130023, People's Republic of China*

**SI1:** The structures and their relative energies of the isomer and transition of  $[\text{XCAI}_3]^q$ ;  $[(\text{X}, q)=(\text{B}, -2), (\text{C}, -1), (\text{N}, 0)]$ .

**SI2:** Low-lying counterion-stabilized species structures of  $\text{Na}^+[\text{C}_2\text{Al}_3]^-$ ,  $\text{Na}^+[\text{BCAl}_3]^{2-}$ ,  $(\text{Na}^+)_2[\text{BCAl}_3]^{2-}$  and  $\text{Mg}^{2+}[\text{BCAl}_3]^{2-}$  molecules.

**SI3:** The details of MD simulations.

**SI4:** Calculated molecular properties of  $[\text{XCAI}_3]^q$ ;  $[(\text{X},q)=(\text{B},-2), (\text{C},-1), (\text{N},0)]$  (pptC) structures.

**SI1-Figure 1~3.** Calculated structures and relative energies for the isomer of the  $[\text{BCAl}_3]^{2-}$ ,  $[\text{C}_2\text{Al}_3]^-$  and  $[\text{NCAI}_3]$ , respectively. The parentheses and square bracket values obtained at the CCSD(T)/6-311+G(2df)//B3LYP/6-311+G(d) and B3LYP/6-311+G(d) levels, respectively. The energy values are in kcal/mol, bond lengths are in angstroms, bond angles in degrees.

**SI1-Figure 4~6.** Optimized geometries of interconversion transition states of  $[\text{BCAl}_3]^{2-}$ ,  $[\text{C}_2\text{Al}_3]^-$  and  $[\text{NCAI}_3]$  at the B3LYP/6-311+G(d) level, respectively. The parentheses and square bracket values obtained at the CCSD(T)/6-311+G(2df)//B3LYP/6-311+G(d) and B3LYP/6-311+G(d) levels, respectively. The energy values are in kcal/mol, bond lengths are in angstroms, bond angles in degrees.

**SI1-Figure 1**

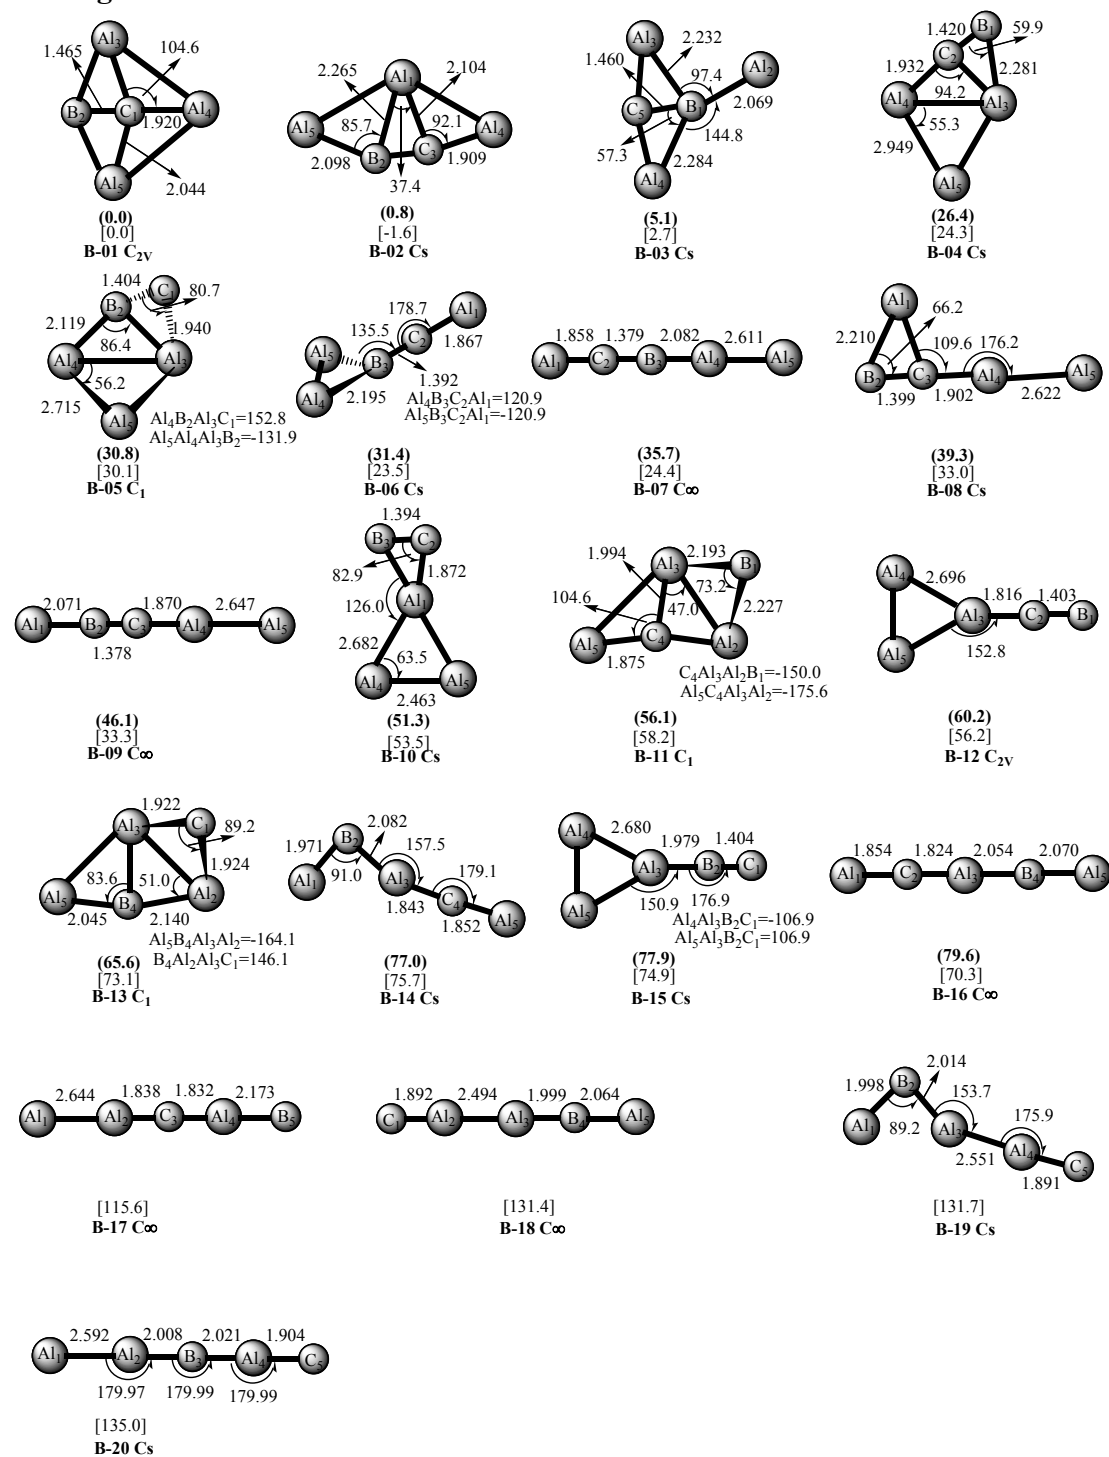

**SI1-Figure 2**

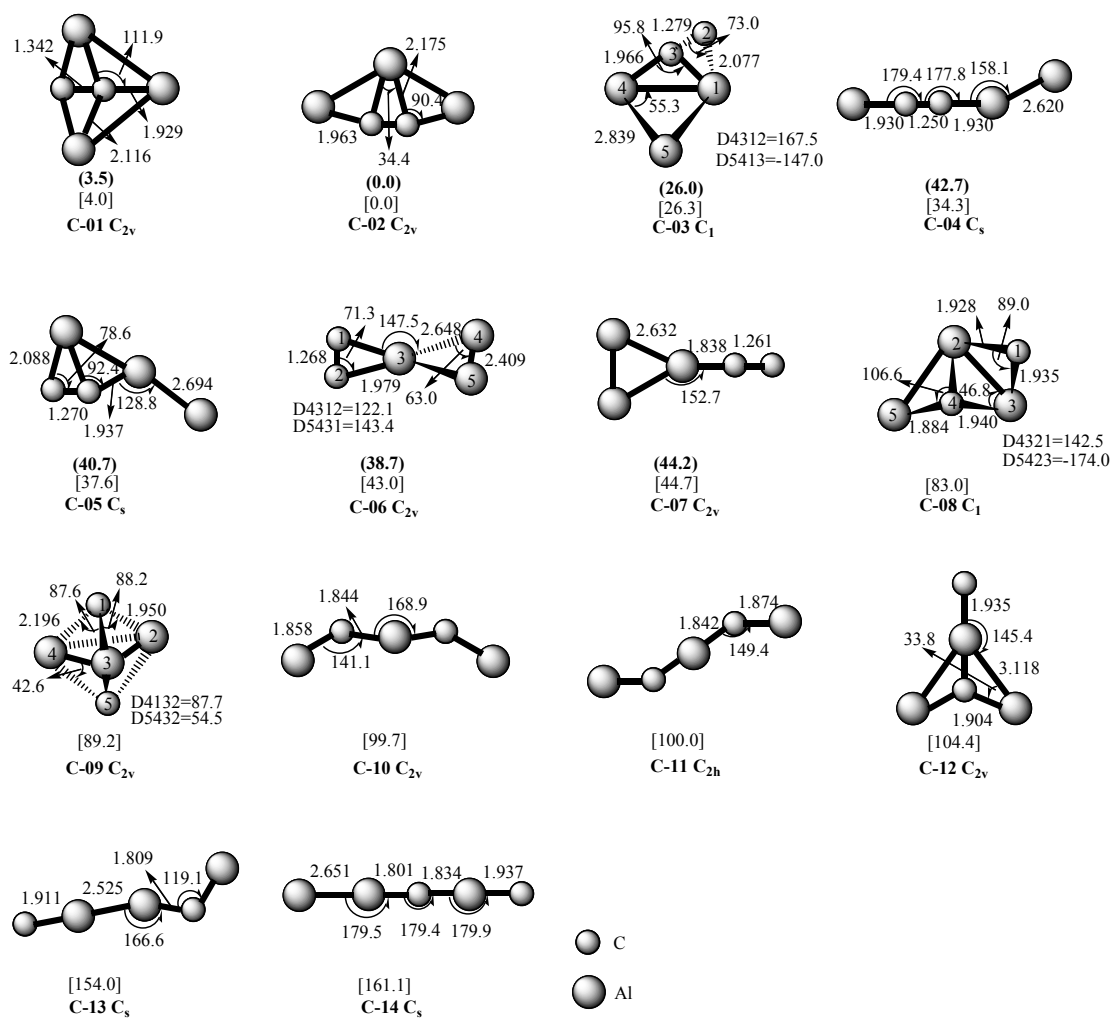

**SI1-Figure 3**

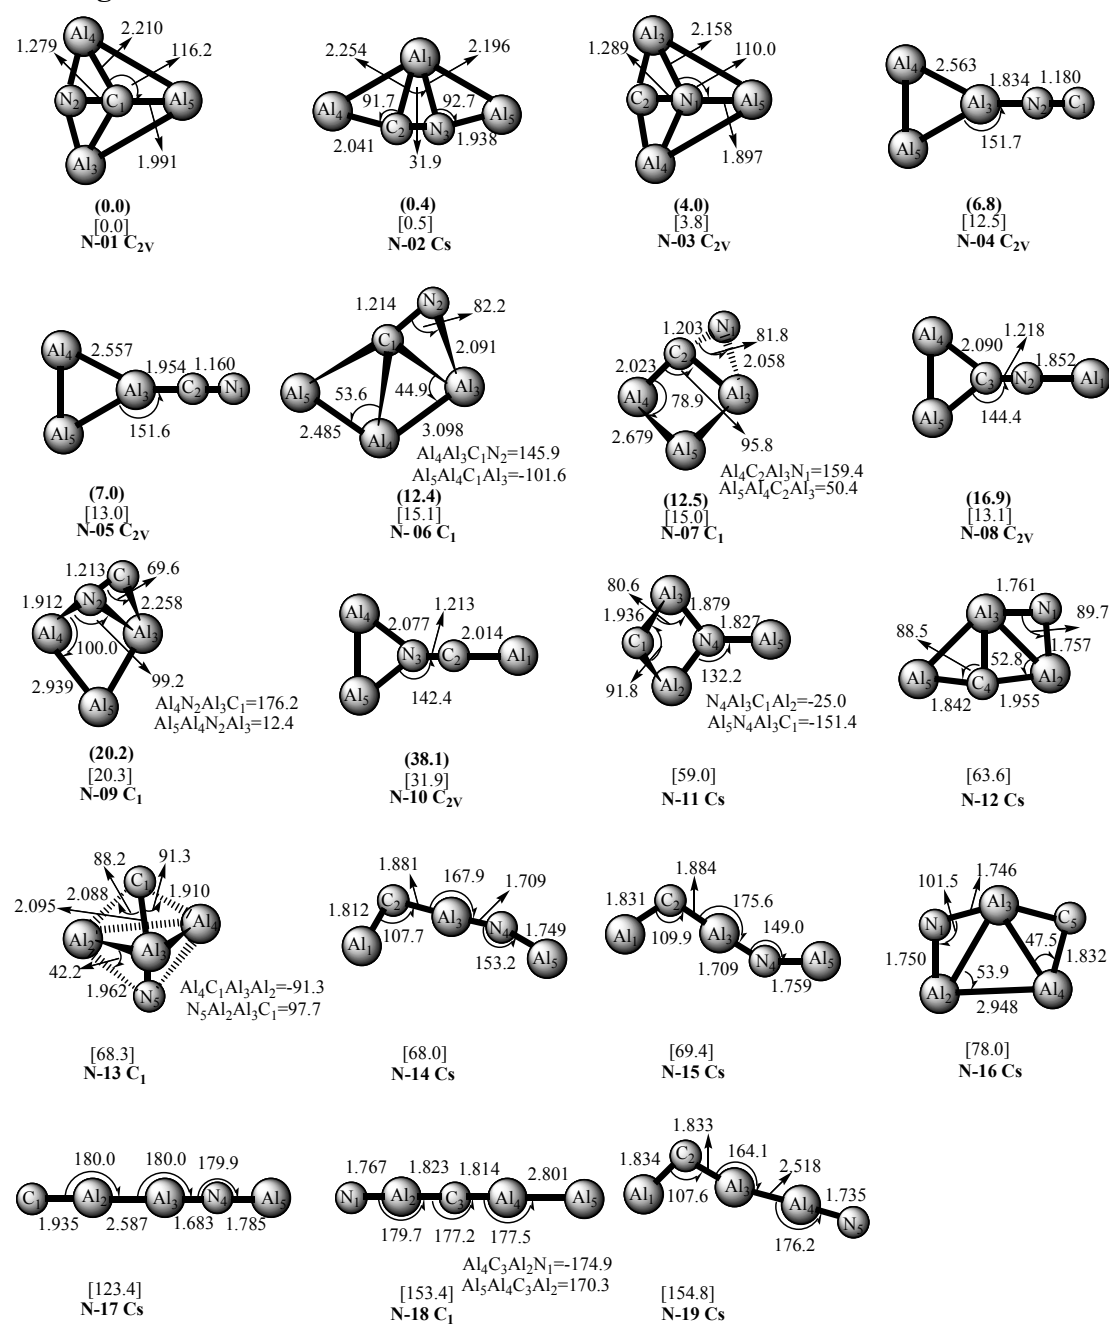

**SI1-Figure 4**

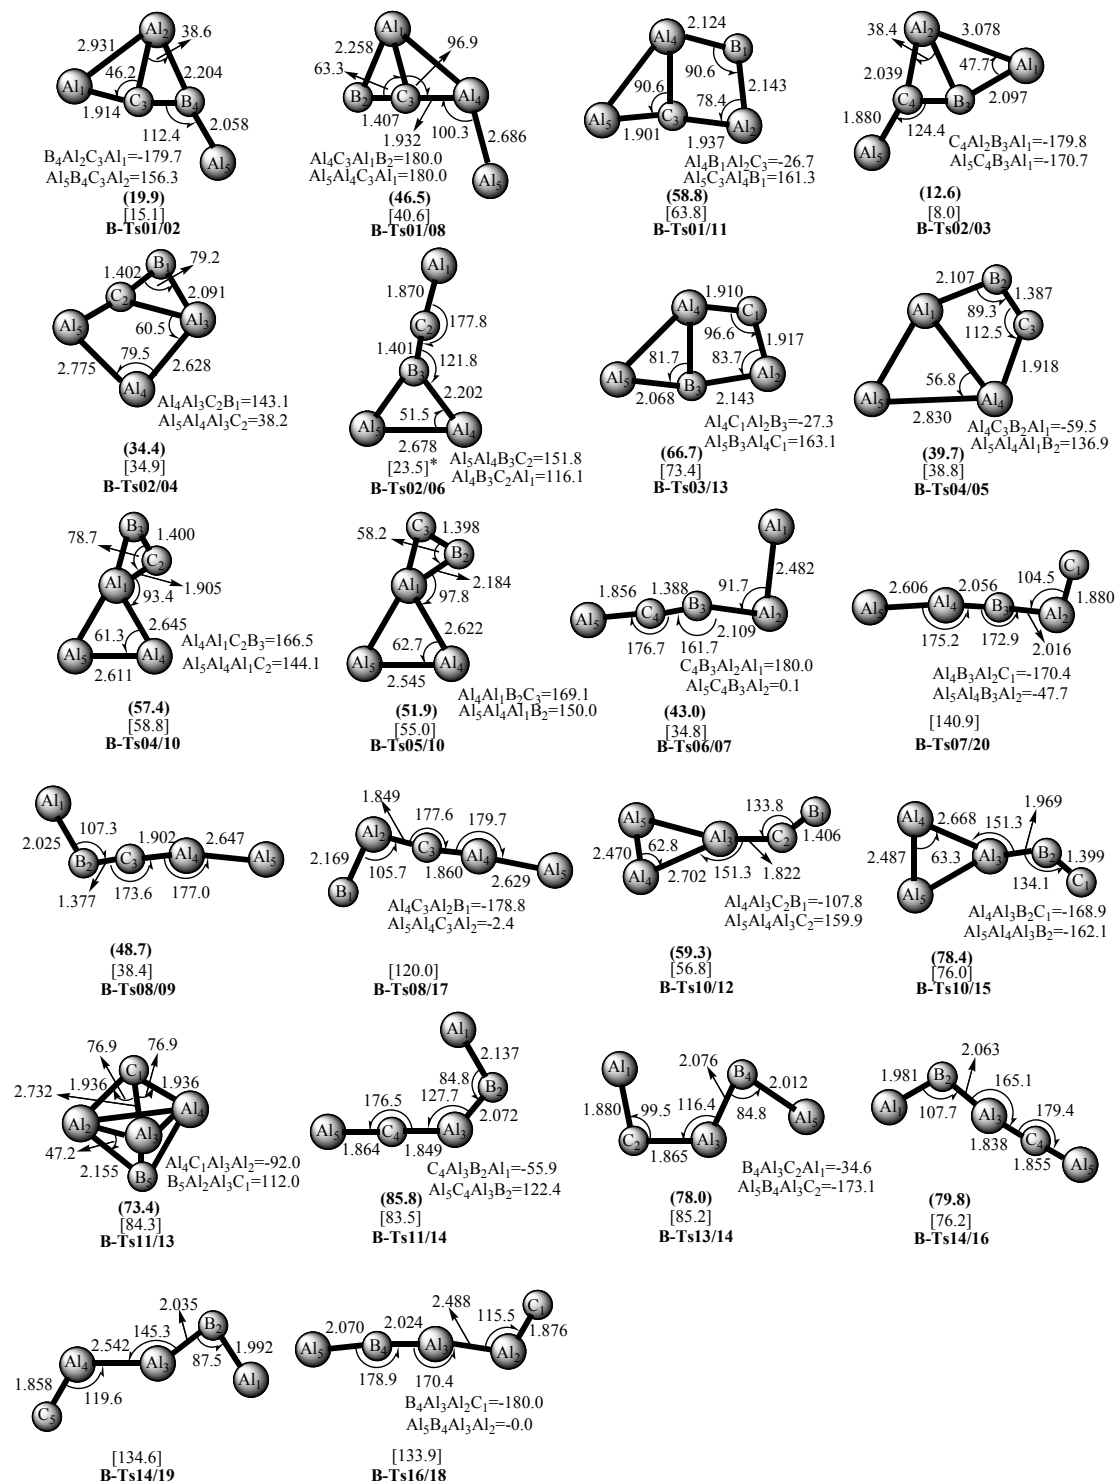

**SI1-Figure 5**

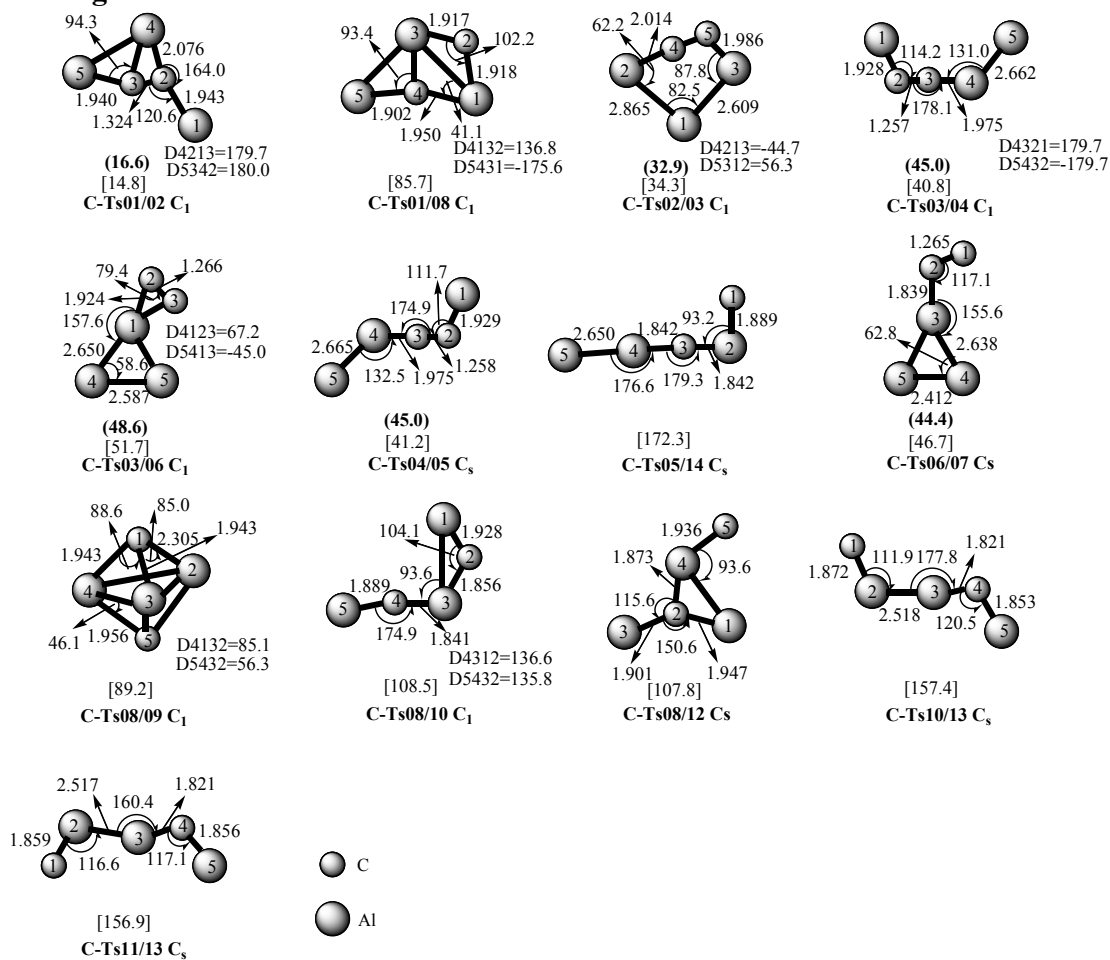

**SI1-Figure 6**

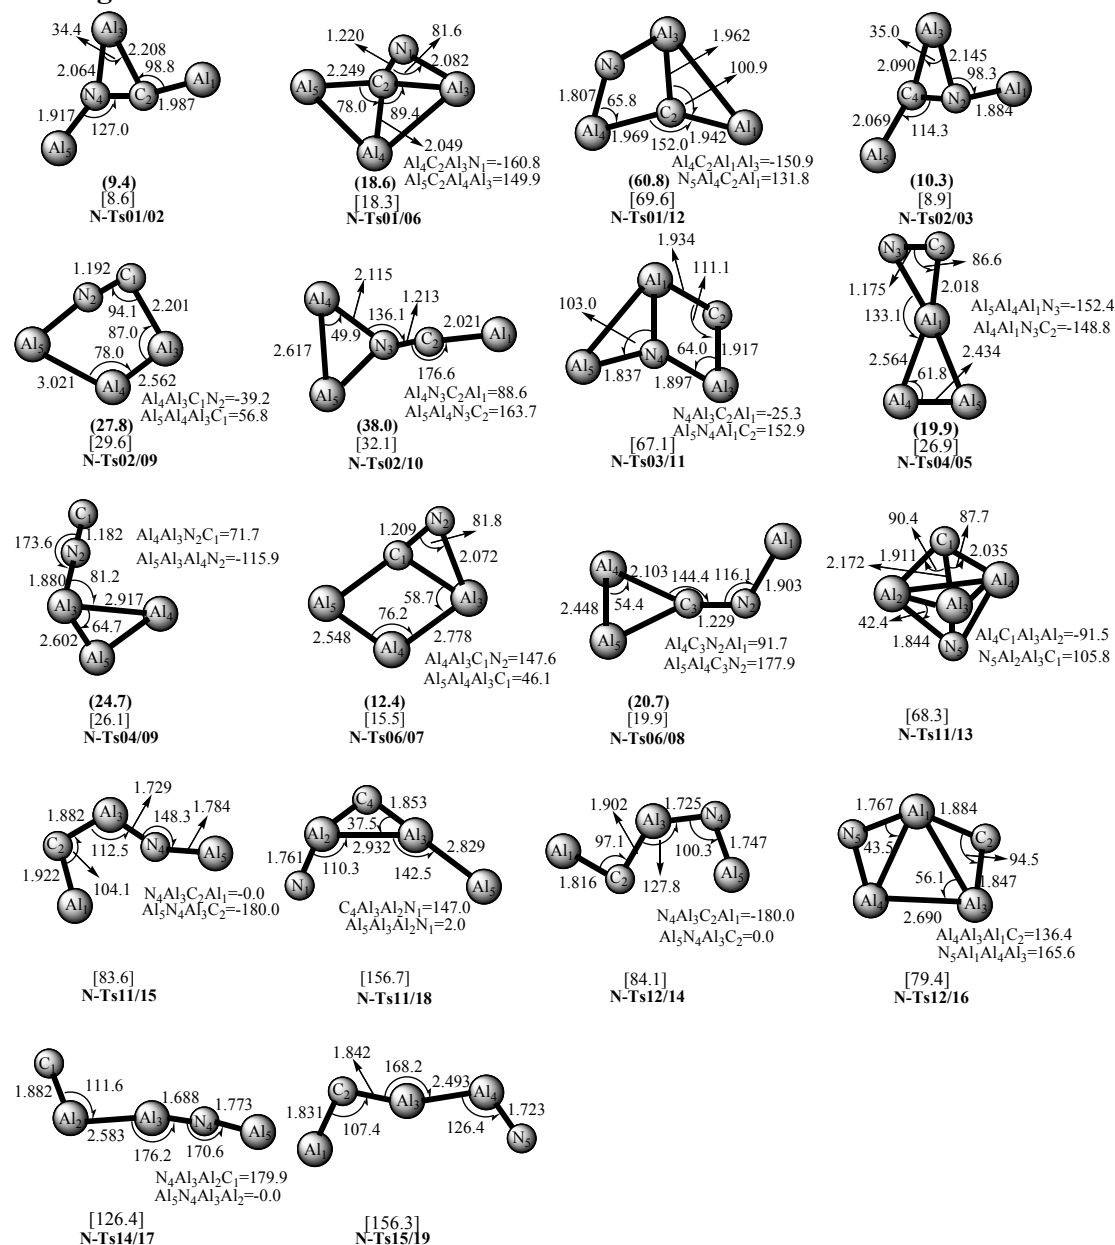



**SI2-Table 1~4.** The structures and relative energies for low-lying isomers of  $\text{Na}^+[\text{C}_2\text{Al}_3]^-$ ,  $\text{Na}^+ [\text{BCAl}_3]^{2-}$ ,  $(\text{Na}^+)_2[\text{BCAl}_3]^{2-}$  and  $\text{Mg}^{2+}[\text{BCAl}_3]^{2-}$  at the B3LYP/6-311+G(d). Single-point calculations for the low-lying isomers at the CCSD(T)/6-311+G(2df)//B3LYP/6-311+G(d) level. The relative energy values ( $\Delta E$ ) are in kcal/mol.

**SI2-Table 1.**

| Na <sup>+</sup> [C <sub>2</sub> Al <sub>3</sub> ] <sup>-</sup> | B3LYP/6-311+G(d) | ΔE  | CCSD(T)/6-311+G(2df)//B3LYP/6-311+G(d) | ΔE         |
|----------------------------------------------------------------|------------------|-----|----------------------------------------|------------|
| 01                                                             | -965.832999      | 0.0 | -963.8725942                           | <b>0.0</b> |
| 02                                                             | -965.8316392     | 0.9 | -963.8716098                           | <b>0.6</b> |
| 03                                                             | -965.8320355     | 0.6 | -963.8678769                           | <b>3.0</b> |
| 04                                                             | -965.8281077     | 3.1 | -963.8632199                           | <b>5.9</b> |

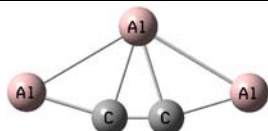

01

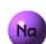

Al,0,0.,2.5609065278,0.3031394279  
Al,0,0.,-2.5609065278,0.3031394279  
C,0,0.,0.6515396918,-0.2657966055  
Al,0,0.,0.,1.8090792025  
C,0,0.,-0.6515396918,-0.2657966055  
Na,0,0.,0.,-2.5678904773

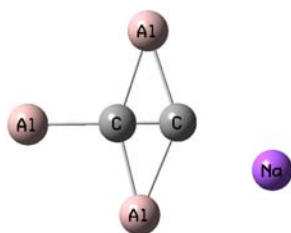

02

C,0,-0.44600442,0.65282595,0.  
Al,0,-2.1061999,-0.64379837,0.  
C,0,0.01885332,-0.59017769,0.  
Al,0,0.71157564,-2.43816384,0.  
Al,0,1.73723874,0.54650229,0.  
Na,0,-0.17191651,2.96228086,0.

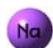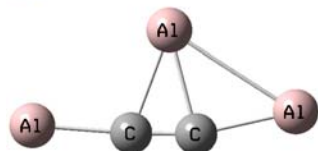

03

C,0,-1.13106686,-0.14298698,0.  
Al,0,1.0399603,-0.2541049,0.  
C,0,-0.76922327,-1.36921785,0.  
Al,0,0.23416429,-3.103525,0.  
Al,0,-1.56234394,1.75366069,0.  
Na,0,1.37714476,2.72043898,0.



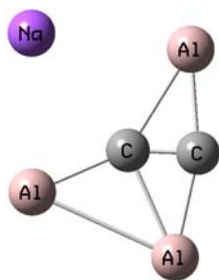

04

Al,0,1.19008209,-1.82253057,0.

Al,0,-0.38647229,1.90348458,0.

C,0,-0.72313675,-1.295904,0.

C,0,-0.23477685,-0.06433807,0.

Al,0,-2.45631638,-0.2267274,0.

Na,0,2.47771218,0.91271447,0.

**SI2-Table 2**

| Na <sup>+</sup> [CBAI <sub>3</sub> ] <sup>2-</sup> | B3LYP/6-311+G(d) | ΔE  | CCSD(T)/6-311+G(2df)//B3LYP/6-311+G(d) | ΔE         |
|----------------------------------------------------|------------------|-----|----------------------------------------|------------|
| 01                                                 | -952.6285527     | 0.0 | -950.6790271                           | <b>0.0</b> |
| 02                                                 | -952.6252952     | 2.0 | -950.671561                            | <b>4.7</b> |
| 03                                                 | -952.6204914     | 5.1 | -950.6699927                           | <b>5.7</b> |
| 04                                                 | -952.6214533     | 4.5 | -950.6697465                           | <b>5.8</b> |
| 05                                                 | -952.6217607     | 4.3 | -950.6669196                           | <b>7.6</b> |
| 06                                                 | -952.6210016     | 4.7 | -950.6659539                           | <b>8.2</b> |
| 07                                                 | -952.621378      | 4.5 | -950.6656635                           | <b>8.4</b> |
| 08                                                 | -952.6153923     | 8.3 | -950.664556                            | <b>9.1</b> |

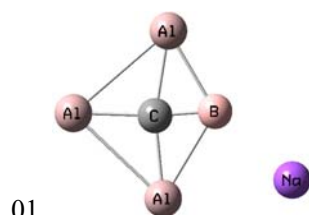

Al,0,2.144895832,-1.0137112145,0.  
Al,0,-0.7626408381,-1.5767339899,0.  
Al,0,1.2938314552,1.8730690985,0.  
C,0,0.4717983674,-0.0091743653,0.  
B,0,-0.6820775572,0.8519812417,0.  
Na,0,-3.1173180394,0.4679775895,0.

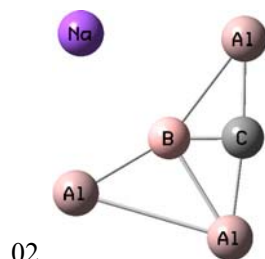

C,0,-0.4669386849,-1.3532036934,0.  
Al,0,1.3940940679,-1.8473518338,0.  
Al,0,-2.3071263242,-0.6398897305,0.  
Al,0,-0.7346129134,2.0625603516,0.  
B,0,-0.1313860274,0.04178998,0.  
Na,0,2.266526162,1.2182448961,0.

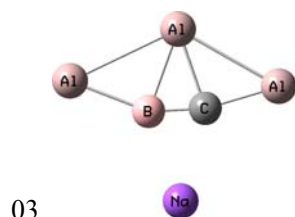

C,0,0.7200165362,0.2171932223,0.  
Al,0,2.526024782,-0.447745479,0.  
Al,0,-2.7052368827,-0.2655243312,0.

Al,0,-0.0814191397,-1.7406133899,0.

B,0,-0.6942593042,0.3802317225,0.

Na,0,0.2462593384,2.5950681653,0.

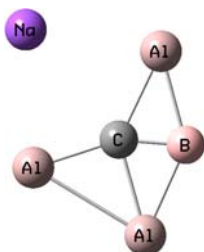

Al,0,0.3143568735,-1.7217214405,0.

Al,0,2.4858727209,0.0804125254,0.

Al,0,-1.169241658,1.6938259396,0.

C,0,0.3415279905,0.2149441028,0.

B,0,0.9207919833,1.5412900368,0.

Na,0,-2.5587330102,-0.9021575341,0.

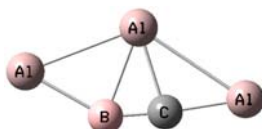

Al,0,1.8926337782,1.2518177298,0.

C,0,-0.9589862682,-0.628295464,0.

Al,0,-0.9543805901,1.4662845098,0.

Al,0,-2.855266333,-0.8872428464,0.

B,0,0.4091941074,-0.3210383071,0.

Na,0,2.6008208858,-1.6863122021,0.

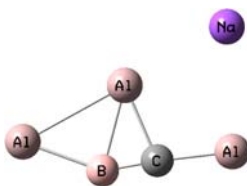

C,0,0.0762316218,1.1753906014,0.

Al,0,-1.7944548256,1.5392250283,0.

Al,0,3.1510407134,-0.3191440156,0.

Al,0,0.2693185183,-0.88323773,0.

B,0,1.4649365671,0.9898506809,0.

Na,0,-2.6322590351,-1.499319565,0.

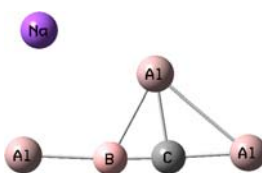

C,0,1.2867301641,-0.7097612013,0.  
Al,0,3.1174476883,-0.1357869549,0.  
Al,0,-2.1049998135,-1.5177027751,0.  
Al,0,0.4860380769,1.1685866939,0.  
B,0,-0.0600052293,-1.0888599315,0.  
Na,0,-2.4795180565,1.513102149,0.

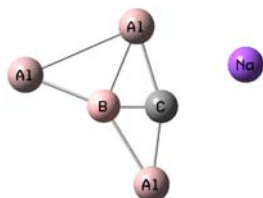

08

C,0,0.6777017979,0.3130773128,0.  
Al,0,0.5960119421,2.2735304287,0.  
Al,0,-0.1114688534,-1.6252728896,0.  
Al,0,-2.776812814,-0.1766927293,0.  
B,0,-0.7611635149,0.4300412828,0.  
Na,0,2.6909687923,-0.9108006653,0.

**SI2-Table 3**

| $(\text{Na}^+)_2[\text{CBAI}_3]^{2-}$ | B3LYP/6-311+G(d) | $\Delta E$ | CCSD(T)/6-311+G(2df)//B3LYP/6-311+G(d) | $\Delta E$  |
|---------------------------------------|------------------|------------|----------------------------------------|-------------|
| 01                                    | -1114.9116513    | 0.0        | -1112.5312561                          | <b>0.0</b>  |
| 02                                    | -1114.9100098    | 1.0        | -1112.5292324                          | <b>1.3</b>  |
| 03                                    | -1114.9033718    | 5.2        | -1112.5233931                          | <b>4.9</b>  |
| 04                                    | -1114.902835     | 5.5        | -1112.521527                           | <b>6.1</b>  |
| 05                                    | -1114.9027882    | 5.6        | -1112.521366                           | <b>6.2</b>  |
| 06                                    | -1114.8970464    | 9.2        | -1112.5137537                          | <b>11.0</b> |
| 07                                    | -1114.9002565    | 7.2        | -1112.5125249                          | <b>11.8</b> |
| 08                                    | -1114.8982815    | 8.4        | -1112.5124858                          | <b>11.8</b> |
| 09                                    | -1114.8941444    | 11.0       | -1112.5102597                          | <b>13.2</b> |

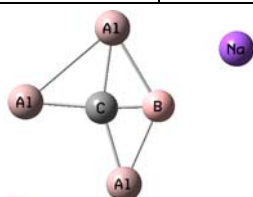

01

Al,0,-1.2874121561,1.5606318141,0.  
Al,0,1.5980087366,1.5211731666,0.  
Al,0,-0.8068713555,-1.6566956012,0.  
C,0,0.0525267591,0.1785154474,0.  
B,0,1.158428817,-0.7383792992,0.  
Na,0,3.600673194,-0.9522261761,0.  
Na,0,-3.5591543252,-0.4891350616,0.

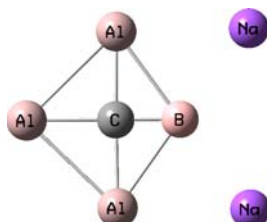

02

Al,0,0.,0.,-2.6512163474  
Al,0,0.,-1.9950113313,-0.6354626294  
Al,0,0.,1.9950113313,-0.6354626294  
C,0,0.,0.,-0.6618583669  
B,0,0.,0.,0.7730321236  
Na,0,0.,-2.0447339544,2.3264023947  
Na,0,0.,2.0447339544,2.3264023947

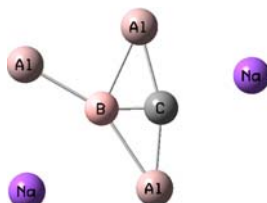

03

C,0,-0.9193134434,0.3342084875,0.

Al,0,-0.1067429135,2.1175625686,0.  
Al,0,-1.0960186779,-1.6946698322,0.  
Al,0,1.8163598376,-1.7717197788,0.  
B,0,0.4421108215,-0.1382330145,0.  
Na,0,-3.2504064019,0.3433548046,0.  
Na,0,2.8250981874,1.1323324148,0.

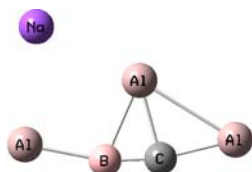

04

C,0,-1.1954310018,-0.1376073235,0.  
Al,0,-2.3301381502,-1.7327641155,0.  
Al,0,1.6476535831,1.8418815702,0.  
Al,0,0.4999663809,-1.2999655508,0.  
B,0,-0.1573401257,0.8207105245,0.  
Na,0,3.3881891952,-0.635568401,0.  
Na,0,-2.4093810017,1.9028242561,0.

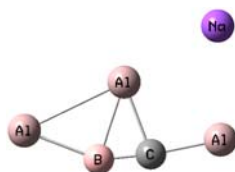

05

C,0,0.2048008777,0.713973951,0.  
Al,0,-1.5319061867,1.5356956088,0.  
Al,0,2.5568292516,-1.8427667157,0.  
Al,0,-0.3820154835,-1.2743883531,0.  
B,0,1.4144960085,-0.0191875337,0.  
Na,0,-3.3189490727,-0.9764647133,0.  
Na,0,1.793726725,2.467252286,0.

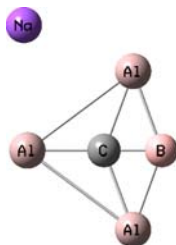

06

Al,0,0.,0.,-1.309986408  
Al,0,0.,-1.9819195414,1.3149199402



Al,0,0.,1.9819195414,1.3149199402

C,0,0.,0.,0.5918942511

B,0,0.,0.,2.0236680844

Na,0,0.,-3.1372504036,-1.399090574

Na,0,0.,3.1372504036,-1.399090574

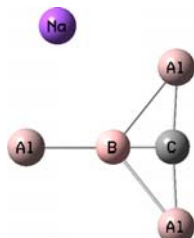

07

Al,0,0.,0.,-1.8814260198

Al,0,0.,-1.9189636801,1.7260853256

Al,0,0.,1.9189636801,1.7260853256

Na,0,0.,-2.9296315361,-1.1359176144

Na,0,0.,2.9296315361,-1.1359176144

B,0,0.,0.,0.2061196176

C,0,0.,0.,1.6322056397

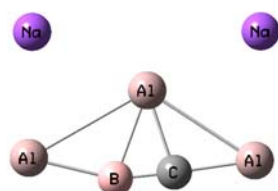

08

C,0,0.6688491827,-1.4731392006,0.

Al,0,2.5631220345,-1.2153523665,0.

Al,0,-2.7402870619,-1.0994152035,0.

Al,0,0.0550236834,0.4671121536,0.

B,0,-0.7170288501,-1.6095764957,0.

Na,0,2.7349339381,1.836849794,0.

Na,0,-2.6333407266,1.8805362987,0.

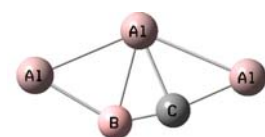

09

C,0,0.9910348972,0.1075948199,0.

Al,0,2.8759549535,-0.4249668327,0.

Al,0,-2.1682470689,-1.1888504528,0.

Al,0,0.4540672659,-1.8947093052,0.

B,0,-0.4282429082,0.1965624351,0.

Na,0,-2.7945548432,1.6099229378,0.

Na,0,0.9929167437,2.4260804579,0.

**SI2-Table 4**

| $\text{Mg}^{2+}[\text{CBAI}_3]^{2-}$ | B3LYP/6-311+G(d) | $\Delta E$ | CCSD(T)/6-311+G(2df)//B3LYP/6-311+G(d) | $\Delta E$  |
|--------------------------------------|------------------|------------|----------------------------------------|-------------|
| 01                                   | -990.3551597     | 1.9        | -988.3924972                           | <b>0.0</b>  |
| 02                                   | -990.3581933     | 0.0        | -988.3889679                           | <b>2.2</b>  |
| 03                                   | -990.349854      | 5.2        | -988.3881677                           | <b>2.7</b>  |
| 04                                   | -990.3495738     | 5.4        | -988.3816949                           | <b>6.8</b>  |
| 05                                   | -990.3446231     | 8.5        | -988.376762                            | <b>9.9</b>  |
| 06                                   | -990.3396081     | 11.7       | -988.3757267                           | <b>10.5</b> |
| 07                                   | -990.3359297     | 14.0       | -988.3713082                           | <b>13.3</b> |
| 08                                   | -990.3306183     | 17.0       | -988.3698041                           | <b>14.2</b> |

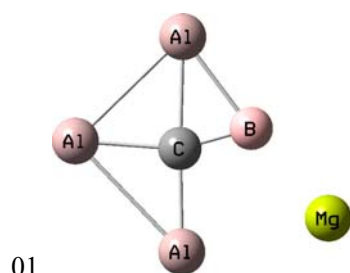

Al,0,2.0506138131,-0.9458660299,0.  
Al,0,-0.8041791165,-1.6847443872,0.  
Al,0,1.3605299246,1.8495486219,0.  
C,0,0.2745825511,-0.0119414555,0.  
B,0,-0.6838963911,1.0391811969,0.  
Mg,0,-2.8491615612,0.3472304137,0.

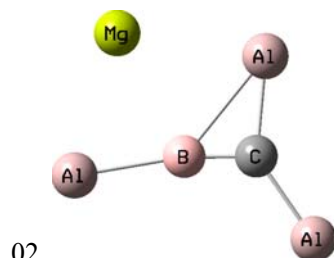

C,0,1.165654151,-0.0361909761,0.  
Al,0,2.8549260523,-1.0258900068,0.  
Al,0,-1.8807602312,-1.8656892943,0.  
Al,0,0.5019762208,1.8014130793,0.  
B,0,-0.1017539242,-0.6348967963,0.  
Mg,0,-2.2943494387,0.9908319742,0.

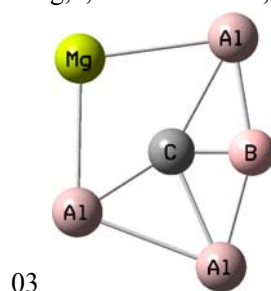

Al,0,0.4225678703,-1.8716006916,0.  
Al,0,2.3743589103,0.0419397204,0.  
Al,0,-1.2717947072,1.9376824226,0.  
C,0,0.131037683,0.0972191094,0.  
B,0,0.7353038574,1.3907073295,0.  
Mg,0,-2.0568987138,-0.6893542603,0.

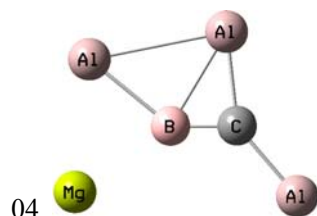

Al,0,2.0524782381,1.0729418515,0.  
C,0,-1.1234694099,-0.1512110681,0.  
Al,0,-0.7908924864,1.8225706244,0.  
Al,0,-2.4720553462,-1.5670507098,0.  
B,0,0.2727775147,-0.2358689118,0.  
Mg,0,2.1951770697,-1.7461683661,0.

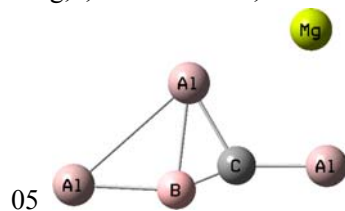

C,0,-0.0236664379,0.8837775881,0.  
Al,0,-1.8041916366,1.6236815729,0.  
Al,0,3.3546801894,-0.0515426806,0.  
Al,0,0.2487145902,-1.1320382657,0.  
B,0,1.3651614041,0.8764208264,0.  
Mg,0,-2.6058845491,-1.1975340412,0.

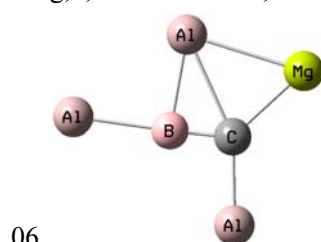

C,0,0.7510561599,0.4858521408,0.  
Al,0,0.6636390563,2.4666204894,0.  
Al,0,-0.1229051592,-1.8564289707,0.  
Al,0,-2.7686424501,-0.1723356725,0.  
B,0,-0.6371505872,0.2642019301,0.  
Mg,0,2.4292403304,-0.8840271771,0.

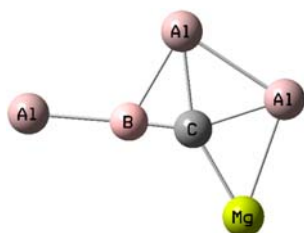

07

C,0,0.3354489019,0.2361475116,0.  
Al,0,2.1508210877,-0.7779171174,0.  
Al,0,-3.2204068711,0.5896311828,0.  
Al,0,-0.3159315422,-1.8068443134,0.  
B,0,-1.0545786402,0.3460936847,0.  
Mg,0,1.7726120439,1.8997283917,0.

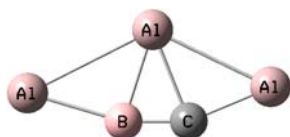

08

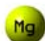

C,0,0.8153614527,0.3042124559,0.  
Al,0,2.5732002017,-0.5406763602,0.  
Al,0,-2.7430635468,-0.1619470403,0.  
Al,0,-0.0678298806,-1.6959458351,0.  
B,0,-0.6141485071,0.3742623478,0.  
Mg,0,0.0478656102,2.4587043419,0.

**SI3-1** The details of MD simulations.

General parameters:

|                              |   |                      |
|------------------------------|---|----------------------|
| Max. points for each Traj.   | = | 3500 and 4000        |
| Total Number of Trajectories | = | 1                    |
| Random Number Generator Seed | = | 398465               |
| Trajectory Step Size         | = | 0.500 sqrt(amu)*bohr |

Sampling parameters:

|                              |   |                                      |
|------------------------------|---|--------------------------------------|
| Vib Energy Sampling Option   | = | Thermal sampling                     |
| TS Sampling direction        | = | Forward                              |
| Vib Sampling Temperature     | = | 300.0 K and 400.0 K                  |
| Rot Energy Sampling Option   | = | Thermal distribution (symmetric top) |
| Rot Sampling Temperature     | = | 300.0 K and 400.0 K                  |
| Start point scaling criteria | = | 1.000D-05 Hartree                    |

Integration parameters:

|                            |   |                            |
|----------------------------|---|----------------------------|
| Correction Scheme          | = | Fifth order polynomial fit |
| Project trans/rot in grad. | = | True                       |
| Project in prediction step | = | True                       |
| Project in correction step | = | True                       |
| Integration Scheme         | = | Bulirsch-Stoer method      |
| Integration Step Size      | = | 2.000D-01 femtosec         |
| Truncation Error Criteria  | = | 1.000D-08 bohr             |
| Energy Error Criteria      | = | 1.000D-04 Hartree          |
| Hessian evaluation         | = | Full Hessian always        |

**SI3-2** Potential energy of three designed systems  $[\text{XCAI}_3]^q$  ( $\text{X}, q = (\text{B}, -2), (\text{C}, -1)$  and  $(\text{N}, 0)$ ). (a)  $[\text{BCAl}_3]^{2-}$ , (b)  $[\text{C}_2\text{Al}_3]^-$ , and (c)  $[\text{NCAI}_3]$  along the MD trajectory at B3LYP/6-31G(d) level, respectively. Born-Oppenheimer molecular dynamics simulation is performed for 10ps at 300K and 400K. Potential energy (in au) versus time (in ps).

(a)

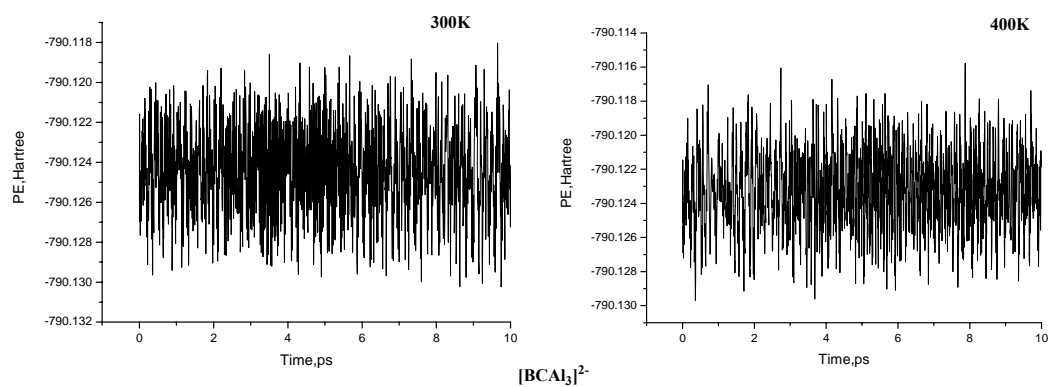

(b)

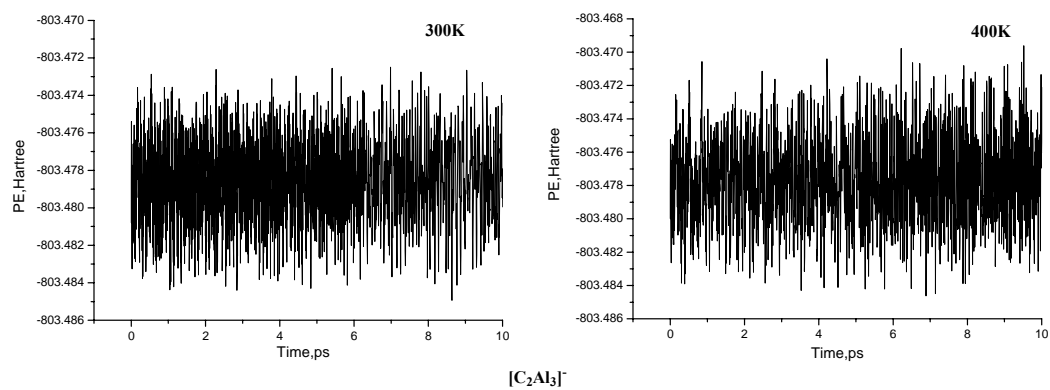

(c)

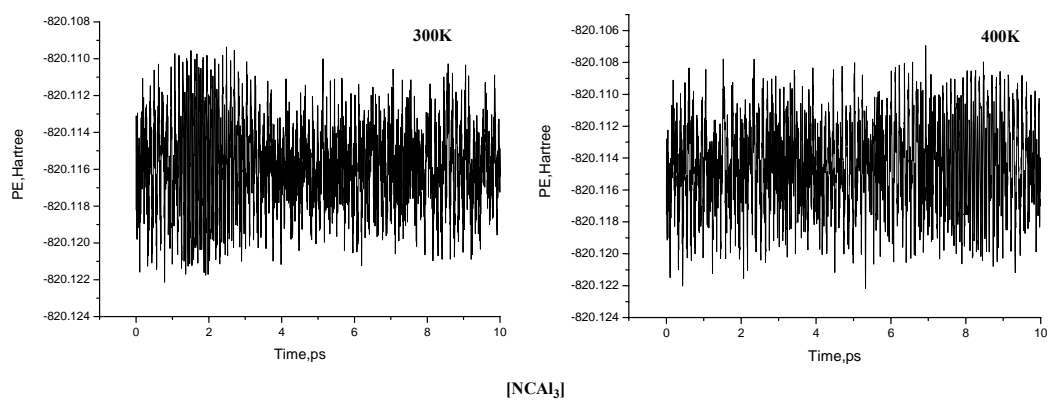

**SI4-Table 1** Calculated molecular properties of the  $[\text{BCAl}_3]^{2-}$  (pptC) structures.

| $\text{BCAl}_3^{2-}$ , $\text{C}_{2v}$ , $^1\text{A}_1$ | B3LYP/aug-cc-pVTZ | MP2/ aug-cc-pVTZ | CCSD(T)/ aug-cc-pVTZ |
|---------------------------------------------------------|-------------------|------------------|----------------------|
| $\text{R}(\text{C}_1\text{-B}_2)$ , Å                   | 1.461             | 1.485            | 1.486                |
| $\text{R}(\text{C}_1\text{-Al}_{3,4})$ , Å              | 2.044             | 2.030            | 2.035                |
| $\text{R}(\text{C}_1\text{-Al}_5)$ , Å                  | 1.917             | 1.938            | 1.939                |
| $\angle \text{Al}_5\text{C}_1\text{Al}_3$ , °           | 105.0             | 103.3            | 103.3                |
| -Etot, au                                               | -790.2375416      | -788.679885      | -788.7317903         |
| $\omega_1(\text{a}_1)$ , $\text{cm}^{-1}$               | 1190              | 1209             | 1165                 |
| $\omega_2(\text{a}_1)$ , $\text{cm}^{-1}$               | 544               | 535              | 539                  |
| $\omega_3(\text{a}_1)$ , $\text{cm}^{-1}$               | 325               | 350              | 340                  |
| $\omega_4(\text{a}_1)$ , $\text{cm}^{-1}$               | 158               | 177              | 162                  |
| $\omega_5(\text{b}_1)$ , $\text{cm}^{-1}$               | 210               | 202              | 197                  |
| $\omega_6(\text{b}_1)$ , $\text{cm}^{-1}$               | 122               | 111              | 112                  |
| $\omega_7(\text{b}_2)$ , $\text{cm}^{-1}$               | 656               | 721              | 708                  |
| $\omega_8(\text{b}_2)$ , $\text{cm}^{-1}$               | 528               | 510              | 514                  |
| $\omega_9(\text{b}_2)$ , $\text{cm}^{-1}$               | 79                | 96               | 99                   |

**SI4-Table 2** Calculated molecular properties of the  $[\text{C}_2\text{Al}_3]^-$  (pptC) structures.

| $\text{C}_2\text{Al}_3^-, \text{C}_{2v}, {}^1\text{A}_1$ | B3LYP/aug-cc-pVTZ | MP2/ aug-cc-pVTZ | CCSD(T)/aug-cc-pVTZ |
|----------------------------------------------------------|-------------------|------------------|---------------------|
| $\text{R}(\text{C}_1\text{-C}_2), \text{\AA}$            | 1.337             | 1.3527           | 1.359               |
| $\text{R}(\text{C}_1\text{-Al}_{3,4}), \text{\AA}$       | 2.107             | 2.0911           | 2.107               |
| $\text{R}(\text{C}_1\text{-Al}_5), \text{\AA}$           | 1.925             | 1.9394           | 1.935               |
| $\angle \text{Al}_5\text{C}_1\text{Al}_3^\circ$          | 111.6             | 110.0            | 110.7               |
| -Etot, au                                                | -803.5806862      | -802.0023153     | -802.0580572        |
| $\omega_1(\text{a}_1), \text{cm}^{-1}$                   | 1453              | 1454             | 1408                |
| $\omega_2(\text{a}_1), \text{cm}^{-1}$                   | 555               | 547              | 560                 |
| $\omega_3(\text{a}_1), \text{cm}^{-1}$                   | 339               | 350              | 349                 |
| $\omega_4(\text{a}_1), \text{cm}^{-1}$                   | 168               | 170              | 174                 |
| $\omega_5(\text{b}_1), \text{cm}^{-1}$                   | 222               | 224              | 216                 |
| $\omega_6(\text{b}_1), \text{cm}^{-1}$                   | 121               | 101              | 105                 |
| $\omega_7(\text{b}_2), \text{cm}^{-1}$                   | 672               | 662              | 666                 |
| $\omega_8(\text{b}_2), \text{cm}^{-1}$                   | 609               | 643              | 649                 |
| $\omega_9(\text{b}_2), \text{cm}^{-1}$                   | 60                | 53               | 60                  |



**SI4-Table 3** Calculated molecular properties of the [NCAI<sub>3</sub>] (pptC) structures.

| NCAI <sub>3</sub> , C <sub>2v</sub> , <sup>1</sup> A <sub>1</sub> | B3LYP/aug-cc-pVTZ | MP2/ aug-cc-pVTZ | CCSD(T)/ aug-cc-pVTZ |
|-------------------------------------------------------------------|-------------------|------------------|----------------------|
| R(C <sub>1</sub> -N <sub>2</sub> ), Å                             | 1.275             | 1.293            | 1.298                |
| R(C <sub>1</sub> -Al <sub>3,4</sub> ), Å                          | 2.197             | 2.171            | 2.192                |
| R(C <sub>1</sub> -Al <sub>5</sub> ), Å                            | 1.986             | 1.988            | 1.976                |
| <Al <sub>5</sub> C <sub>1</sub> Al <sub>3</sub> , °               | 116.1             | 114.0            | 116.3                |
| -E <sub>tot</sub> , au                                            | -820.2221039      | -818.6223296     | -818.678994          |
| ω <sub>1</sub> (a <sub>1</sub> ), cm <sup>-1</sup>                | 1549              | 1490             | 1496                 |
| ω <sub>2</sub> (a <sub>1</sub> ), cm <sup>-1</sup>                | 483               | 493              | 496                  |
| ω <sub>3</sub> (a <sub>1</sub> ), cm <sup>-1</sup>                | 315               | 319              | 329                  |
| ω <sub>4</sub> (a <sub>1</sub> ), cm <sup>-1</sup>                | 157               | 163              | 162                  |
| ω <sub>5</sub> (b <sub>1</sub> ), cm <sup>-1</sup>                | 192               | 199              | 201                  |
| ω <sub>6</sub> (b <sub>1</sub> ), cm <sup>-1</sup>                | 114               | 107              | 112                  |
| ω <sub>7</sub> (b <sub>2</sub> ), cm <sup>-1</sup>                | 594               | 581              | 606                  |
| ω <sub>8</sub> (b <sub>2</sub> ), cm <sup>-1</sup>                | 486               | 563              | 525                  |
| ω <sub>9</sub> (b <sub>2</sub> ), cm <sup>-1</sup>                | 47                | 42               | 37                   |
